# Supplementary material for: The Filtering Effect of Oil Palm Plantations on Potential Insect Pollinator Assemblages from Remnant Forest Patches
Source: MDPI journal article supplement (doi:10.3390/land12061256), 2023-06-19
Supplement: s1 [file s1]

## Supplementary Information

**Figure S1.** Rarefied species accumulation curves (solid lines) with confidence intervals (dashed lines) for insect orders in Saremas 1 HCV 4 (black) and Bukit Durang (grey) and the plantation adjacent to HCV 4 (dark green) and Bukit Durang (light green).

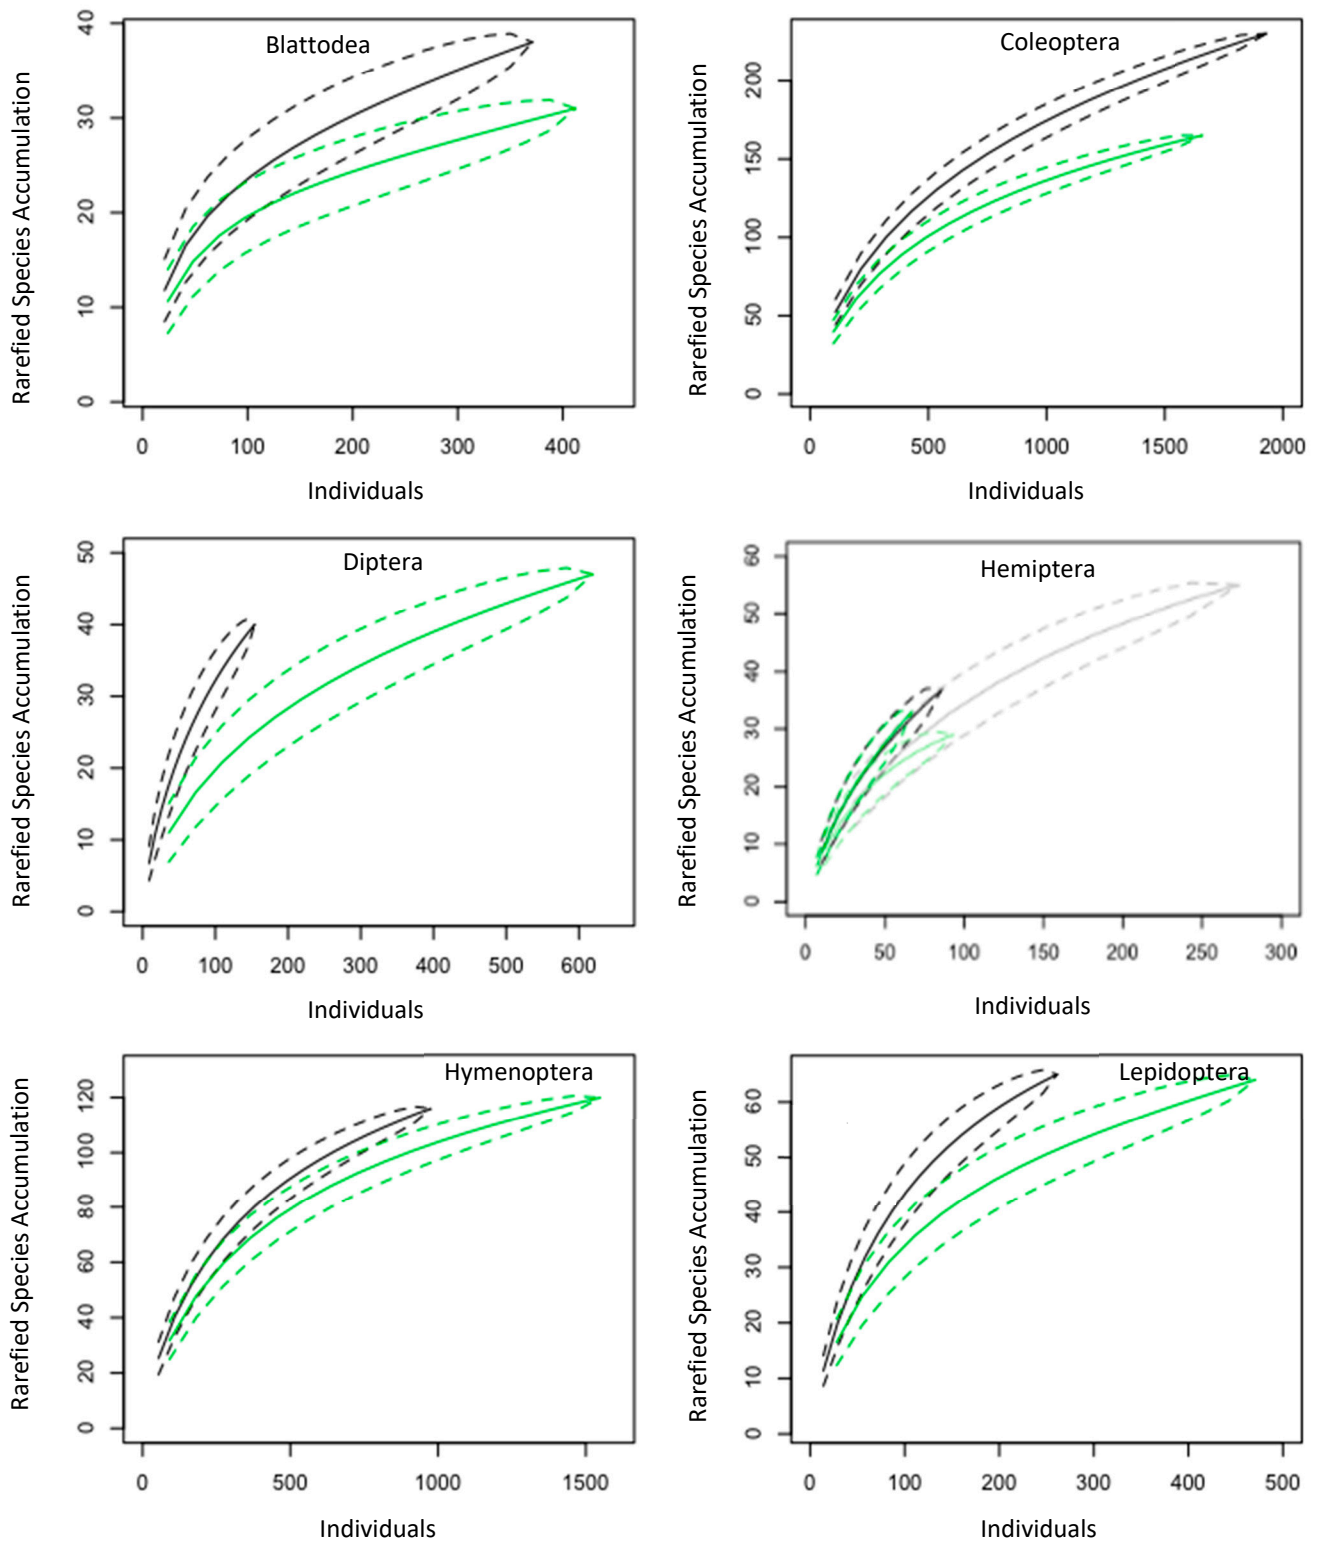

**Figure S2.** Comparison of the functional diversity of bee communities in oil palm (A), Bukit Durang (B), and Saremas 1 HCV4 (C). Blue bar represents the known functional range of the global community; red bar represents the functional range at habitat (forest) level. FRis scores for each community are provided. The Functional trait range is given on the x-axis. For further information, please see the methods.

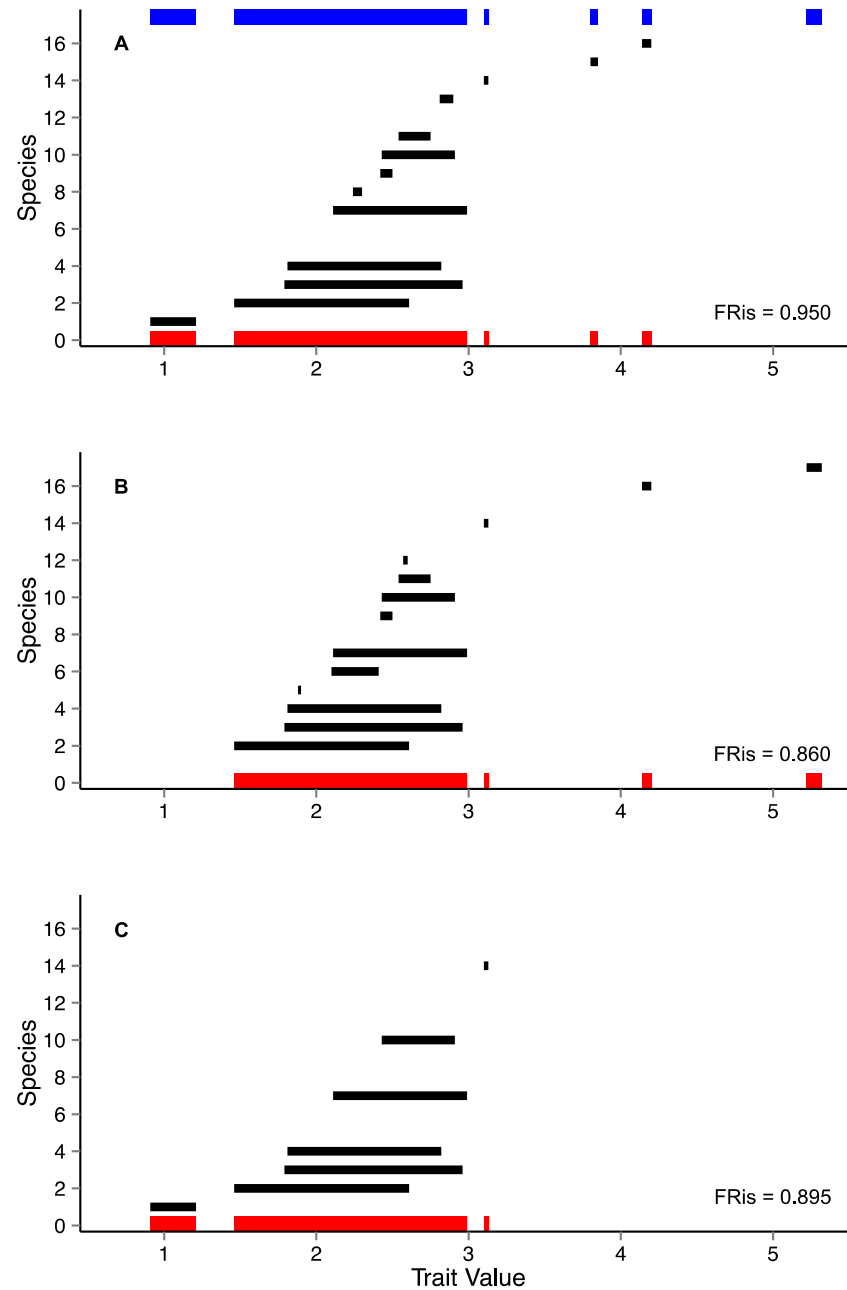

**Figure S3.** Comparison of the functional diversity of fly communities in oil palm (A), Bukit Durang (B), and Saremas 1 HCV4 (C). Blue bar represents the functional range of the global community; red bar represents the functional range at habitat level. FRis scores for each community are provided.

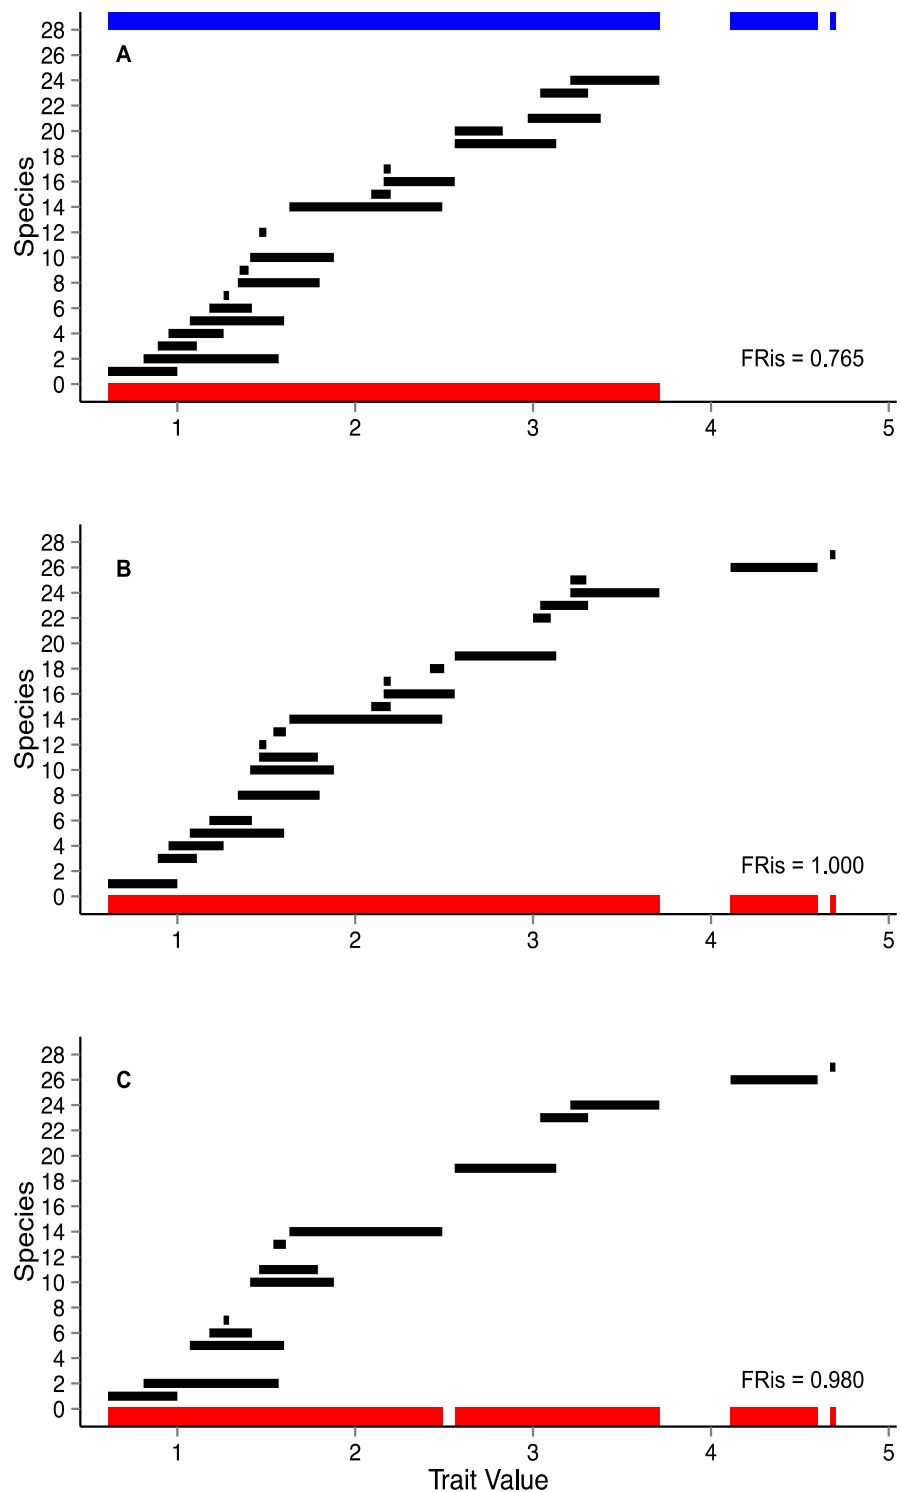

**Table S1.** Bee diversity, richness and abundance for forest and plantation. Data are provided separately for each forest patch and the adjacent plantation.

| Diversity index             | Forest  |         | Plantation |         |
|-----------------------------|---------|---------|------------|---------|
|                             | Patch 1 | Patch 2 | Patch 1    | Patch 2 |
| Chao 1                      | 7.50    | 8.50    | 16.50      | 12.50   |
| Exp (Shannon- Weiner index) | 5.783   | 6.937   | 7.585      | 8.679   |
| Simpson's index (D)         | 0.802   | 0.839   | 0.844      | 0.865   |
| Rarefied species richness   | 6       | 7       | 8          | 8       |
| Observed species richness   | 7       | 8       | 9          | 11      |
| Individuals                 | 22      | 23      | 15         | 32      |
