# Supplementary material for: The Filtering Effect of Oil Palm Plantations on Potential Insect Pollinator Assemblages from Remnant Forest Patches
Source: MDPI journal article supplement (doi:10.3390/land12061256), 2023-06-19
Supplement: s1 [file s1]

Archive with 1 entries (1 files):
- land-2358144-SI.pdf
